# Supplementary material for: Modular, tissue-specific, and biodegradable hydrogel cross-linkers for tissue engineering
Source: PubMed Central journal article supplement — Sci Adv. 2019 Jun 5;5(6):eaaw7396. doi: 10.1126/sciadv.aaw7396 (PMC6551165; doi:10.1126/sciadv.aaw7396), 2019-06-05
Supplement: aaw7396_SM.pdf [file aaw7396_SM.pdf]

## Supplementary Materials for

### **Modular, tissue-specific, and biodegradable hydrogel cross-linkers for tissue engineering**

J. L. Guo, Y. S. Kim, V. Y. Xie, B. T. Smith, E. Watson, J. Lam, H. A. Pearce, P. S. Engel, A. G. Mikos\*

\*Corresponding author. Email: mikos@rice.edu

Published 5 June 2019, *Sci. Adv.* **5**, eaaw7396 (2019)

DOI: 10.1126/sciadv.aaw7396

#### **This PDF file includes:**

Fig. S1. Correlation of PdBT to starting materials on  $^1\text{H}$  and  $^{13}\text{C}$  NMR.

Fig. S2. Measurement of biomolecule incorporation using DMMB and Coomassie blue assays.

Fig. S3. Modulation of PdBT degradation kinetics by PGA block length.

Fig. S4. GPC standard curve.

Table S1. An overview of PdBT compared to several commonly used in situ hydrogel cross-linkers.

References (38–40)

## Supplementary Materials

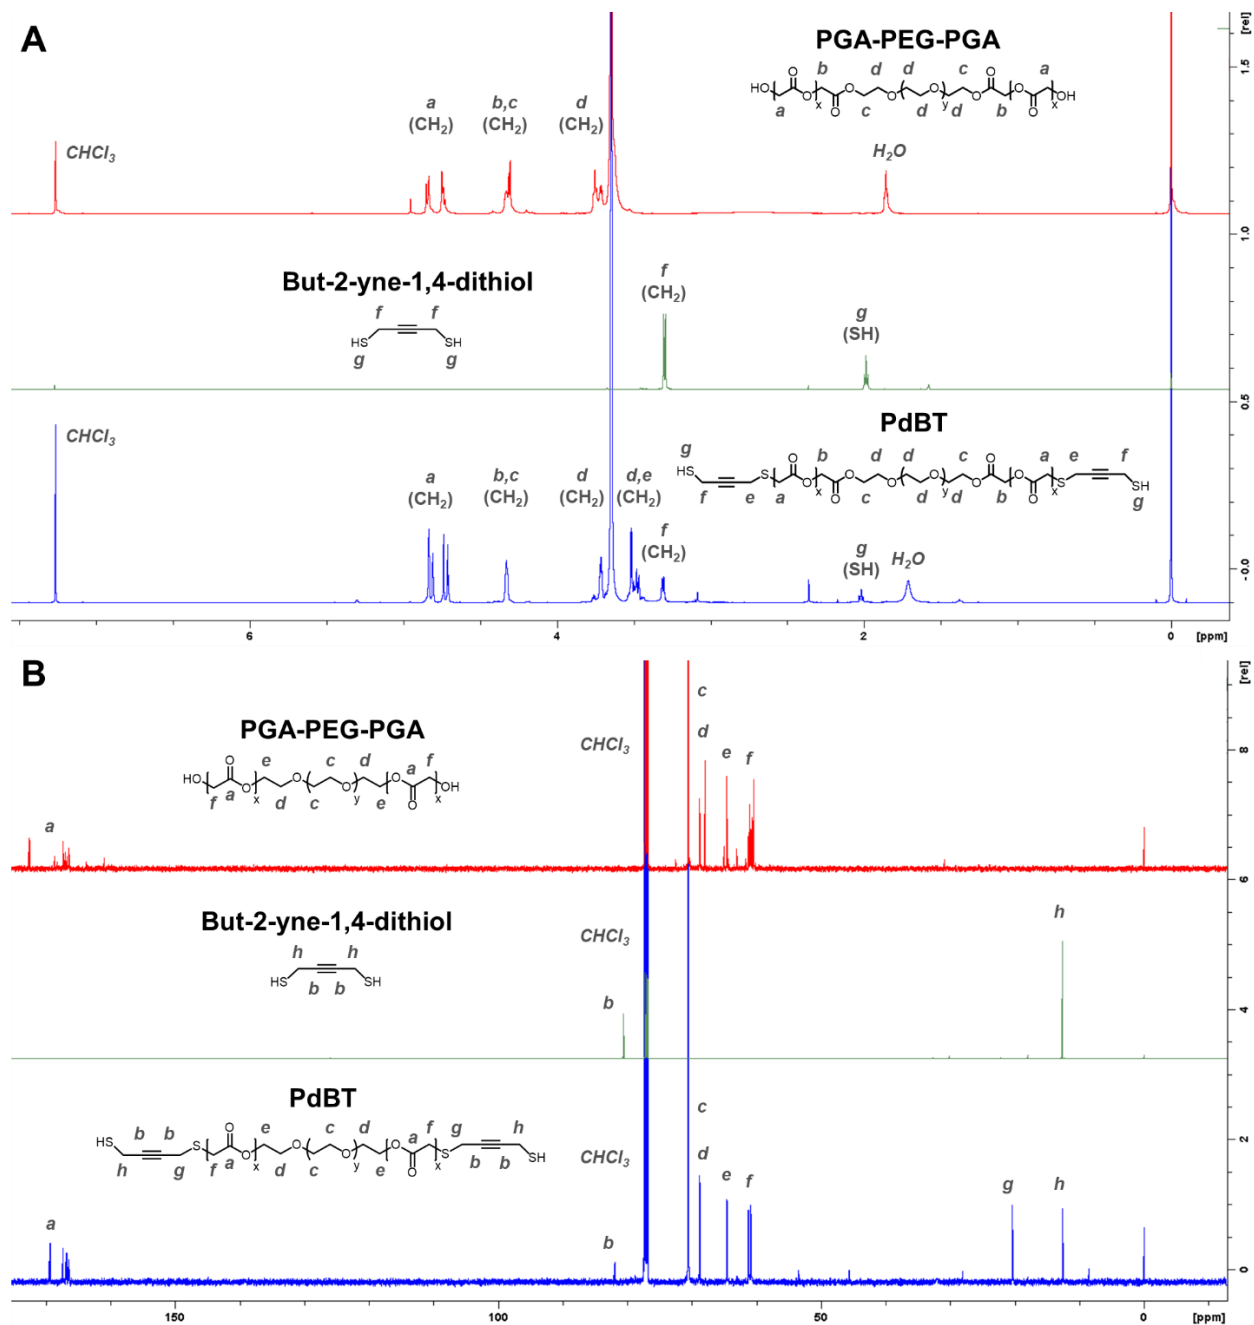

**Fig. S1. Correlation of PdBT to starting materials on  $^1\text{H}$  and  $^{13}\text{C}$  NMR.** (A)  $^1\text{H}$  NMR spectra are compared between two constituent starting materials, PGA-PEG-PGA and but-2-yne-1,4-dithiol, and the final synthesized crosslinker, PdBT. Peaks are identified consistently between spectra using the letters a-g. (B)  $^{13}\text{C}$  NMR spectra are compared between PdBT and starting materials, PGA-PEG-PGA and but-2-yne-1,4-dithiol. Peaks are identified consistently between spectra using the letters a-h.

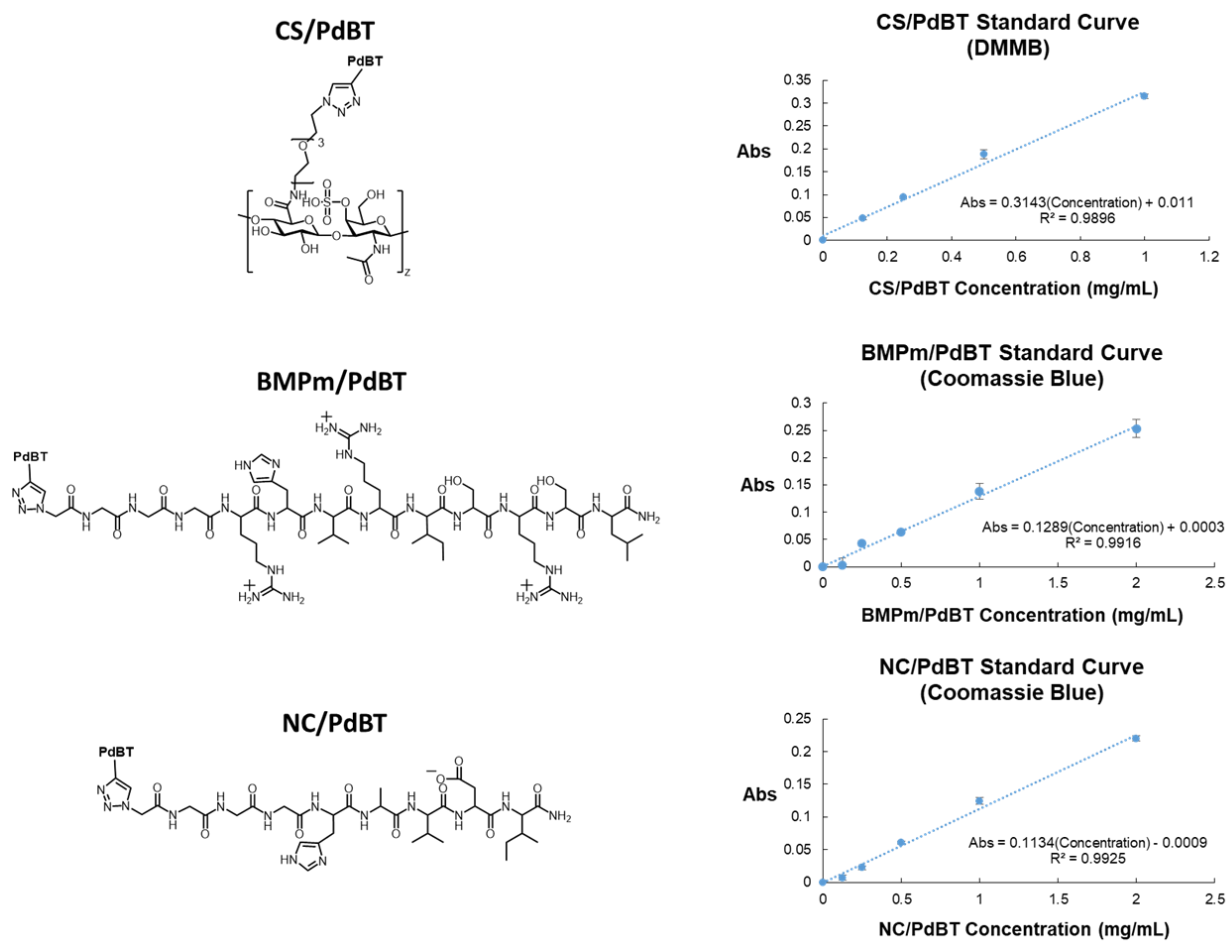

|                  | Leached Concentration (mg/mL) | % Mass Retention in Crosslinked Gel |
|------------------|-------------------------------|-------------------------------------|
| <b>CS/PdBT</b>   | 0.134 ± 0.035                 | 94.9 ± 1.3                          |
| <b>BMPm/PdBT</b> | 0.348 ± 0.046                 | 90.1 ± 1.3                          |
| <b>NC/PdBT</b>   | 0.223 ± 0.017                 | 88.7 ± 0.9                          |

**Fig. S2. Measurement of biomolecule incorporation using DMMB and Coomassie blue assays.** Assays were performed for CS/PdBT, BMPm/PdBT, and NC/PdBT using standards of known macromer concentrations in PBS at pH 7.4. Standard curves are shown (top) with points reported as means ± standard deviation for a sample size of n=3. The leached biomolecule concentrations, and their corresponding percentages of mass retention inside the hydrogels (bottom) are reported as means ± standard deviation for a sample size of n=3.

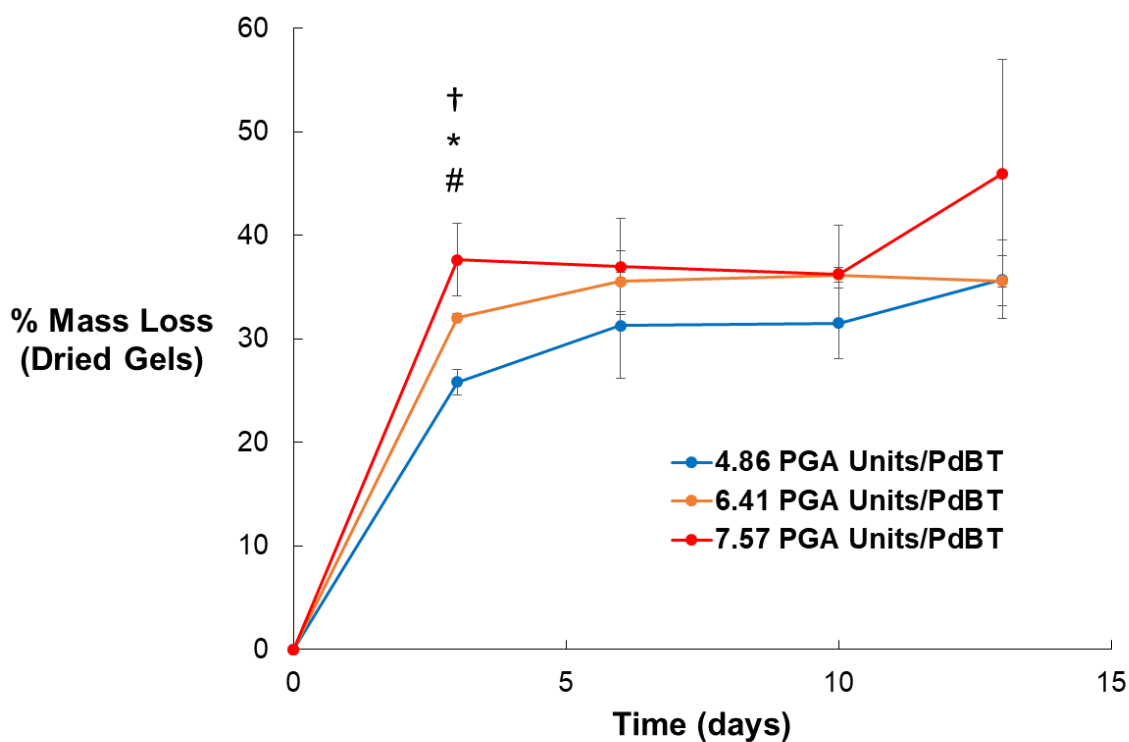

**Fig. S3. Modulation of PdBT degradation kinetics by PGA block length.** Accelerated degradation over a 14 day period of PdBT-crosslinked hydrogels in 0.1M HCl at 37 °C, with varying average molar number of PGA units per PdBT chain (as quantified by NMR) and 3.5% w/v PdBT. # indicates statistical significance of 4.86 PGA Units/PdBT group vs. 6.41 PGA Units/PdBT group, \* indicates statistical significance of 4.86 PGA Units/PdBT group vs. 7.57 PGA Units/PdBT group, and † indicates statistical significance of 6.41 PGA Units/PdBT group vs. 7.57 PGA Units/PdBT group at a given timepoint. Data are reported as means  $\pm$  standard deviation for a sample size of n=3.

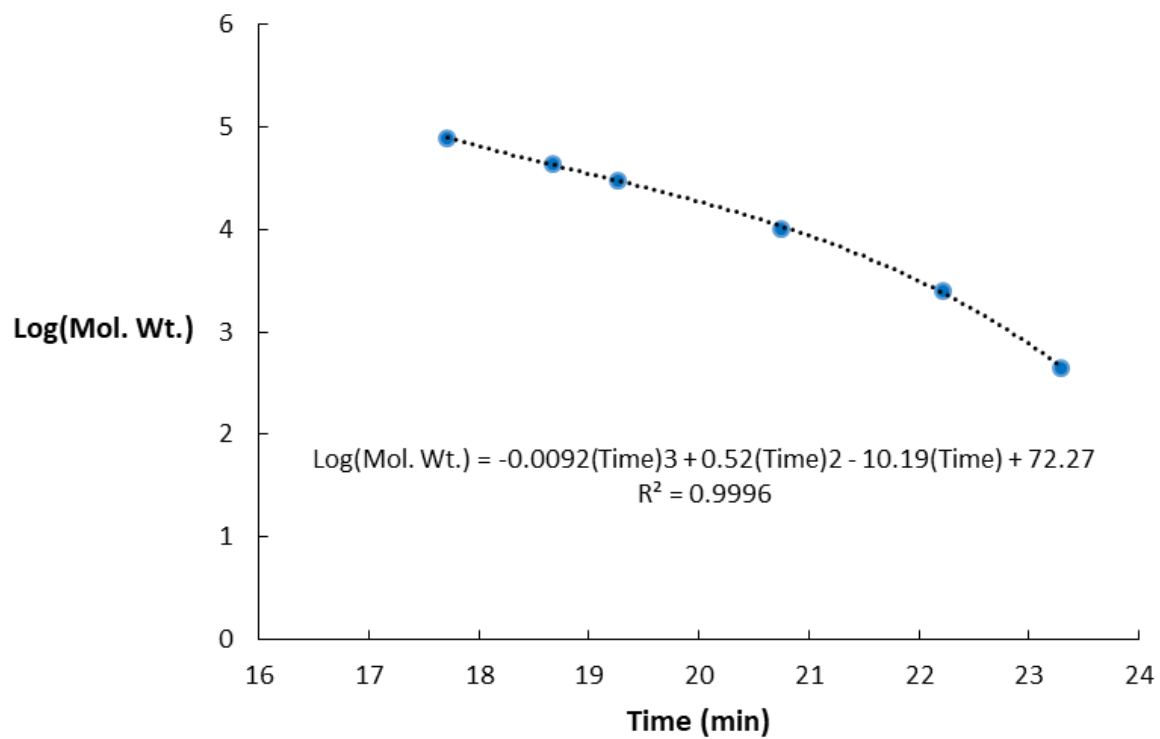

**Fig. S4. GPC standard curve.** Curve was obtained using narrowly dispersed 450, 2500, 10225, 30250, 44000, and 78300 Da PEG standards dissolved in 100mM NaNO<sub>3</sub>. Points are reported as means ± standard deviation for a sample size of n=3.

**Table S1. An overview of PdBT compared to several commonly used *in situ* hydrogel crosslinkers.** PdBT possesses many of the favorable characteristics and requirements of traditional crosslinkers, such as cytocompatibility, hydrolytic degradability, and fast reaction kinetics, while novelly enabling tissue-specific biological cues from the crosslinker itself by its prefunctionalization with tissue-specific biomolecules such as peptides and glycosaminoglycans.

| <b>Crosslinker/<br/>Crosslinking<br/>Method</b>                  | <b>Cytocompatibility</b>                                  | <b>Degradability</b>                                             | <b>Crosslinking<br/>Kinetics</b>                                              | <b>Biological Cues</b>                                                       |
|------------------------------------------------------------------|-----------------------------------------------------------|------------------------------------------------------------------|-------------------------------------------------------------------------------|------------------------------------------------------------------------------|
| <b>Linear<br/>poly(ethylene<br/>glycol) (PEG)</b><br>(21, 38)    | Excellent                                                 | Afforded by co-<br>polymerization<br>with hydrolysable<br>units  | Dependent on<br>functional termini<br>(usually < 60 min)                      | None (requires<br>additional delivery<br>of biomolecules)                    |
| <b>Branched/<br/>Multi-arm PEG</b><br>(21, 38)                   | Excellent                                                 | Afforded by co-<br>polymerization<br>with hydrolysable<br>units  | Dependent on<br>multiple<br>functional termini<br>(usually < 60 min)          | None (requires<br>additional<br>delivery/entrapment<br>of biomolecules)      |
| <b>Polyelectrolytes</b><br>(38, 39)                              | Potentially<br>cytotoxic<br>(concentration-<br>dependent) | Afforded if<br>polyelectrolyte<br>contains<br>hydrolysable units | Fast (often < 30<br>min)                                                      | Occasionally,<br>depending on base<br>polymer                                |
| <b>UV induced<br/>self-crosslinking</b><br>(38, 40)              | Dependent on<br>selection of<br>photoinitiators           | Limited,<br>depending on<br>degradability of<br>base polymer     | Dependent on<br>photoinitiator and<br>functional groups<br>(usually < 60 min) | Occasionally,<br>depending on base<br>polymer                                |
| <b>Chemically<br/>induced self-<br/>crosslinking</b><br>(38, 40) | Dependent on<br>selection of<br>initiators                | Limited,<br>depending on<br>degradability of<br>base polymer     | Dependent on<br>initiator and<br>functional groups<br>(usually < 60 min)      | Occasionally,<br>depending on base<br>polymer                                |
| <b>PdBT</b>                                                      | Excellent                                                 | Provided by<br>poly(glycolic<br>acid) units                      | < 60 min                                                                      | Provided <i>in situ</i> by<br>conjugated tissue-<br>specific<br>biomolecules |
